# Supplementary material
Source: Research Square preprint supplement (doi:10.21203/rs.3.rs-9204170/v1)
Supplement: Supplementary file 2 [file a1e30f4167d24699fe998381.pdf]

# eMERGE Main Checklist

| No.                                                           | Criteria Headings                              | Reporting Criteria                                                                                                            | Location reported                                       |
|---------------------------------------------------------------|------------------------------------------------|-------------------------------------------------------------------------------------------------------------------------------|---------------------------------------------------------|
| <b>Phase 1—Selecting meta-ethnography and getting started</b> |                                                |                                                                                                                               | —                                                       |
| <i>Introduction</i>                                           |                                                |                                                                                                                               | —                                                       |
| 1                                                             | Rationale and context for the meta-ethnography | Describe the gap in research or knowledge to be filled by the meta-ethnography, and the wider context of the meta-ethnography | Section 2.2.3., Pages 13-14                             |
| 2                                                             | Aim(s) of the meta-ethnography                 | Describe the meta-ethnography aim(s)                                                                                          | Section 2.2.3., Pages 13-14                             |
| 3                                                             | Focus of the meta-ethnography                  | Describe the meta-ethnography review question(s) (or objectives)                                                              | Section 2.2.3., Pages 13-14                             |
| 4                                                             | Rationale for using meta-ethnography           | Explain why meta-ethnography was considered the most appropriate qualitative synthesis methodology                            | Section 2.2.3., Pages 13-14                             |
| <b>Phase 2—Deciding what is relevant</b>                      |                                                |                                                                                                                               | —                                                       |
| <i>Methods</i>                                                |                                                |                                                                                                                               | —                                                       |
| 5                                                             | Search strategy                                | Describe the rationale for the literature search strategy                                                                     | Section 2.1.3., Pages 5-7                               |
| 6                                                             | Search processes                               | Describe how the literature searching was carried out and by whom                                                             | Section 2.1.3., Pages 5-7                               |
| 7                                                             | Selecting primary studies                      | Describe the process of study screening and selection, and who was involved                                                   | Section 2.1.2., Pages 4-5;<br>Section 2.1.4., Pages 7-8 |
| <i>Findings</i>                                               |                                                |                                                                                                                               | —                                                       |

|                                                    |                                                 |                                                                                                                                                                                            |                                                        |
|----------------------------------------------------|-------------------------------------------------|--------------------------------------------------------------------------------------------------------------------------------------------------------------------------------------------|--------------------------------------------------------|
| 8                                                  | Outcome of study selection                      | Describe the results of study searches and screening                                                                                                                                       | Section 3.1.2., Pages 14-15                            |
| <b>Phase 3—Reading included studies</b>            |                                                 |                                                                                                                                                                                            |                                                        |
| <i>Methods</i>                                     |                                                 |                                                                                                                                                                                            | —                                                      |
| 9                                                  | Reading and data extraction approach            | Describe the reading and data extraction method and processes                                                                                                                              | Section 2.1.5., Pages 8-9; Section 2.2.3., Pages 13-14 |
| <i>Findings</i>                                    |                                                 |                                                                                                                                                                                            | —                                                      |
| 10                                                 | Presenting characteristics of included studies  | Describe characteristics of the included studies                                                                                                                                           | Section 3.1.3., Page 16; Table 2.1, Pages 66-70        |
| <b>Phase 4—Determining how studies are related</b> |                                                 |                                                                                                                                                                                            | —                                                      |
| <i>Methods</i>                                     |                                                 |                                                                                                                                                                                            | —                                                      |
| 11                                                 | Process for determining how studies are related | Describe the methods and processes for determining how the included studies are related:<br><br>- Which aspects of studies were compared<br><br>AND<br><br>- How the studies were compared | Section 2.2.3., Page 13; Section 3.1.9., Page 27       |
| <i>Findings</i>                                    |                                                 |                                                                                                                                                                                            | —                                                      |
| 12                                                 | Outcome of relating studies                     | Describe how studies relate to each other                                                                                                                                                  | Section 3.1.9., Page 27; Tables 4.1-4.4, Pages 78-80   |

|                                                     |                                |                                                                                                                                                                                                                                                                                                                                                          |                                |
|-----------------------------------------------------|--------------------------------|----------------------------------------------------------------------------------------------------------------------------------------------------------------------------------------------------------------------------------------------------------------------------------------------------------------------------------------------------------|--------------------------------|
| <b>Phase 5—Translating studies into one another</b> |                                |                                                                                                                                                                                                                                                                                                                                                          | —                              |
| <i>Methods</i>                                      |                                |                                                                                                                                                                                                                                                                                                                                                          | —                              |
| 13                                                  | Process of translating studies | Describe the methods of translation:<br><br>- Describe steps taken to preserve the context and meaning of the relationships between concepts within and across studies- Describe how the reciprocal and refutational translations were conducted- Describe how potential alternative interpretations or explanations were considered in the translations | Section 2.2.3.,<br>Pages 13-14 |
| <i>Findings</i>                                     |                                |                                                                                                                                                                                                                                                                                                                                                          | —                              |
| 14                                                  | Outcome of translation         | Describe the interpretive findings of the translation.                                                                                                                                                                                                                                                                                                   | Section 3.1.9.,<br>Page 27     |
| <b>Phase 6—Synthesizing translations</b>            |                                |                                                                                                                                                                                                                                                                                                                                                          | —                              |
| <i>Methods</i>                                      |                                |                                                                                                                                                                                                                                                                                                                                                          | —                              |
| 15                                                  | Synthesis process              | Describe the methods used to develop overarching concepts (“synthesised translations”)Describe how potential alternative interpretations or explanations were considered in the synthesis                                                                                                                                                                | Section 3.2.1.,<br>Pages 27-33 |
| <i>Findings</i>                                     |                                |                                                                                                                                                                                                                                                                                                                                                          | —                              |
| 16                                                  | Outcome of synthesis process   | Describe the new theory, conceptual framework, model, configuration, or interpretation of data developed from the synthesis                                                                                                                                                                                                                              | Section 3.2.1.,<br>Pages 27-33 |
| <b>Phase 7—Expressing the synthesis</b>             |                                |                                                                                                                                                                                                                                                                                                                                                          | —                              |
| <i>Discussion</i>                                   |                                |                                                                                                                                                                                                                                                                                                                                                          | —                              |
| 17                                                  | Summary of findings            | Summarize the main interpretive findings of the translation and synthesis and compare them to existing literature                                                                                                                                                                                                                                        | Section 4.1.1.,<br>Pages 37-40 |

|    |                                         |                                                                                                                                                                                                                                                                                                                                                                                                            |                         |
|----|-----------------------------------------|------------------------------------------------------------------------------------------------------------------------------------------------------------------------------------------------------------------------------------------------------------------------------------------------------------------------------------------------------------------------------------------------------------|-------------------------|
| 18 | Strengths, limitations, and reflexivity | <p>Reflect on and describe the strengths and limitations of the synthesis:</p> <ul style="list-style-type: none"> <li>- Methodological aspects—for example, describe how the synthesis findings were influenced by the nature of the included studies and how the meta-ethnography was conducted.</li> <li>- Reflexivity—for example, the impact of the research team on the synthesis findings</li> </ul> | Section 4.1.1., Page 40 |
| 19 | Recommendations and conclusions         | Describe the implications of the synthesis                                                                                                                                                                                                                                                                                                                                                                 | Section 4.1.1., Page 40 |

*From:* France, E. F., Cunningham, M., Ring, N., Uny, I., Duncan, E. A. S., Jepson, R. G., Maxwell, M., Roberts, R. J., Turley, R. L., Booth, A., Britten, N., Flemming, K., Gallagher, I., Garside, R., Hannes, K., Lewin, S., Noblit, G. W., Pope, C., Thomas, J., & Vanstone, M. (2019). Improving reporting of meta-ethnography: The eMERGe reporting guidance. *Psycho-Oncology*, 28(3), 447–458. <https://doi.org/10.1002/pon.4915>
